# Supplementary material for: Supramolecular interactions impacting on the water stability of tubular metal–organic frameworks
Source: Royal Society of Chemistry journal article supplement (doi:10.1039/c3ra44910f), 2013-01-01
Supplement: c3ra44910f.pdf [file c3ra44910f.pdf]

Electronic Supplementary Information for the manuscript:

## Supramolecular Interactions Impacting on the Water Stability of Tubular Metal-Organic Frameworks

Marco Taddei,<sup>a</sup> Andrea Ienco,<sup>\*b</sup> Ferdinando Costantino<sup>\*a,b</sup> and Annalisa Guerri<sup>c</sup>

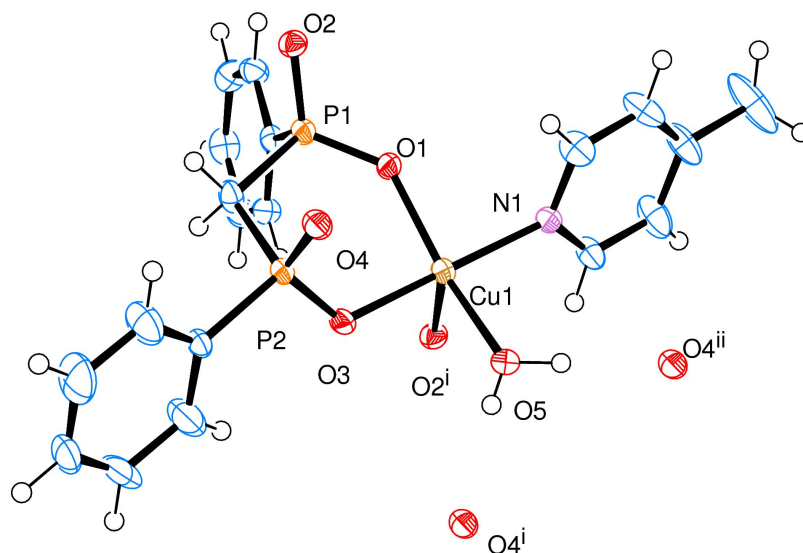

**Figure 1S:** Perspective view of the asymmetric unit of  $[[\text{Cu}_2(\text{H}_2\text{O})_2(\text{pcp})_2\text{bpye}]_n$ . For sake of clarity, the Oxygen atoms involved in the hydrogen bonds with the water molecule and in the Copper coordination are also reported. ORTEP drawing with 50% probability ellipsoid. O2i and O4i have been obtained using  $x+1,y,z$  symmetry transformation and O4ii has been obtained using  $-x+1,-y,-z$  symmetry transformation.



|                                   | <b>STRIP</b>                                                                                                     | <b>Co-pcp-bpye</b>                                                                                               |
|-----------------------------------|------------------------------------------------------------------------------------------------------------------|------------------------------------------------------------------------------------------------------------------|
| Empirical formula                 | C <sub>19</sub> H <sub>20</sub> Cu N O <sub>5</sub> P <sub>2</sub>                                               | C <sub>19</sub> H <sub>20</sub> Co N O <sub>5</sub> P <sub>2</sub>                                               |
| Formula weight                    | 467.84                                                                                                           | 463.23                                                                                                           |
| Temperature                       | 173(2) K                                                                                                         | 293(2) K                                                                                                         |
| Wavelength                        | 1.5418 Å                                                                                                         | 0.71069 Å                                                                                                        |
| Crystal system                    | Triclinic                                                                                                        | Triclinic                                                                                                        |
| Space group                       | P -1                                                                                                             | P -1                                                                                                             |
| Unit cell dimensions              | a = 5.6921(2) Å<br>b = 13.3051(5) Å<br>c = 13.9862(6) Å<br>α = 64.365(4)°.<br>β = 80.711(3)°.<br>γ = 86.393(3)°. | a = 5.7631(3) Å<br>b = 13.0859(8) Å<br>c = 13.6759(7) Å<br>α = 67.345(5)°.<br>β = 81.812(5)°.<br>γ = 89.757(5)°. |
| Volume                            | 942.42(7) Å <sup>3</sup>                                                                                         | 940.64(10) Å <sup>3</sup>                                                                                        |
| Z                                 | 2                                                                                                                | 2                                                                                                                |
| Density (calculated)              | 1.649 Mg/m <sup>3</sup>                                                                                          | 1.635 Mg/m <sup>3</sup>                                                                                          |
| Absorption coefficient            | 3.532 mm <sup>-1</sup>                                                                                           | 1.115 mm <sup>-1</sup>                                                                                           |
| F(000)                            | 480                                                                                                              | 476                                                                                                              |
| Crystal size                      | 0.15 x 0.12 x 0.08 mm <sup>3</sup>                                                                               | 0.2 x 0.1 x 0.04 mm <sup>3</sup>                                                                                 |
| Theta range for data collection   | 3.865 to 72.375°.                                                                                                | 3.881 to 28.876°.                                                                                                |
| Index ranges                      | -6 ≤ h ≤ 6, -16 ≤ k ≤ 16, -17 ≤ l ≤ 17                                                                           | -7 ≤ h ≤ 7, -17 ≤ k ≤ 15, -17 ≤ l ≤ 18                                                                           |
| Reflections collected             | 17585                                                                                                            | 7559                                                                                                             |
| Independent reflections           | 3666 [R(int) = 0.0513]                                                                                           | 4188 [R(int) = 0.0416]                                                                                           |
| Completeness to theta =           | (67.68°) 99.8 %                                                                                                  | (25.00°) 99.4 %                                                                                                  |
| Absorption correction             | Semi-empirical from equivalents                                                                                  | Semi-empirical from equivalents                                                                                  |
| Max. and min. transmission        | 0.838 and 0.393                                                                                                  | 1 and 0.76057                                                                                                    |
| Refinement method                 | Full-matrix least-squares on F <sup>2</sup>                                                                      | Full-matrix least-squares on F <sup>2</sup>                                                                      |
| Data / restraints / parameters    | 3666 / 0 / 261                                                                                                   | 4188 / 2 / 259                                                                                                   |
| Goodness-of-fit on F <sup>2</sup> | 1.004                                                                                                            | 0.84                                                                                                             |
| Final R indices [I > 2σ(I)]       | R1 = 0.0365, wR2 = 0.0875                                                                                        | R1 = 0.042, wR2 = 0.0676                                                                                         |
| R indices (all data)              | R1 = 0.0626, wR2 = 0.0983                                                                                        | R1 = 0.0891, wR2 = 0.0746                                                                                        |
| Largest diff. peak and hole       | 0.445 and -0.385 e.Å <sup>-3</sup>                                                                               | 0.381 and -0.429 e.Å <sup>-3</sup>                                                                               |

**Table 1S.** Crystal data and structure refinement for STRIP and Co-pcp-bpye

| STRIP             | Co-pcp-bpye |                               |
|-------------------|-------------|-------------------------------|
| Cu(1)-O(1)        | 1.964(2)    | Co(1)-O(1) 2.059(2)           |
| Cu(1)-O(2)#1      | 2.207(2)    | Co(1)-O(2)#1 2.0690(19)       |
| Cu(1)-O(3)        | 1.963(2)    | Co(1)-O(3) 2.0805(18)         |
| Cu(1)-O(5)        | 1.985(2)    | Co(1)-O(5) 2.116(2)           |
|                   |             | Co(1)-O(5)#2 2.420(2)         |
| Cu(1)-N(1)        | 2.023(2)    | Co(1)-N(1) 2.163(2)           |
| P(1)-O(1)         | 1.518(2)    | P(1)-O(1) 1.510(2)            |
| P(1)-O(2)         | 1.501(2)    | P(1)-O(2) 1.503(2)            |
| P(1)-C(1)         | 1.829(3)    | P(1)-C(1) 1.823(3)            |
| P(1)-C(11)        | 1.808(3)    | P(1)-C(11) 1.804(3)           |
| P(2)-O(3)         | 1.516(2)    | P(2)-O(3) 1.503(2)            |
| P(2)-O(4)         | 1.508(2)    | P(2)-O(4) 1.510(2)            |
| P(2)-C(1)         | 1.813(3)    | P(2)-C(1) 1.803(3)            |
| P(2)-C(21)        | 1.803(3)    | P(2)-C(21) 1.805(3)           |
|                   |             |                               |
| O(1)-Cu(1)-O(2)#1 | 105.74(8)   | O(1)-Co(1)-O(2)#1 108.90(8)   |
| O(1)-Cu(1)-O(3)   | 92.38(9)    | O(1)-Co(1)-O(3) 88.75(8)      |
| O(1)-Cu(1)-O(5)   | 159.86(10)  | O(1)-Co(1)-O(5) 157.26(8)     |
| O(1)-Cu(1)-N(1)   | 88.77(10)   | O(1)-Co(1)-O(5)#2 87.66(8)    |
| O(2)#1-Cu(1)-O(3) | 94.21(9)    | O(1)-Co(1)-N(1) 89.22(9)      |
| O(2)#1-Cu(1)-O(5) | 94.40(9)    | O(2)#1-Co(1)-O(3) 92.35(7)    |
| O(2)#1-Cu(1)-N(1) | 90.92(10)   | O(2)#1-Co(1)-O(5) 93.63(8)    |
| O(3)-Cu(1)-O(5)   | 86.57(10)   | O(2)#1-Co(1)-N(1) 88.93(8)    |
| O(3)-Cu(1)-N(1)   | 174.22(10)  | O(2)#1-Co(1)-O(5)#2 163.43(8) |
| O(5)-Cu(1)-N(1)   | 90.39(11)   | O(3)-Co(1)-O(5) 87.25(8)      |
|                   |             | O(3)-Co(1)-O(5)#2 87.31(7)    |
|                   |             | O(3)-Co(1)-N(1) 177.86(10)    |
|                   |             | O(5)-Co(1)-N(1) 94.38(9)      |
|                   |             | O(5)-Co(1)-O(5)#2 69.81(9)    |
|                   |             | O(5)#2-Co(1)-N(1) 91.95(8)    |

**Table 2S.** Selected bond lengths [Å] and angles [°] for STRIP and Co-pcp-bpye.

Symmetry transformations used to generate equivalent atoms: #1  $x+1,y,z$ ; #2  $-x+1,-y,-z$ .

| D-H...A                                                                                 | d(D-H)    | d(H...A)   | d(D...A) | <(DHA) |
|-----------------------------------------------------------------------------------------|-----------|------------|----------|--------|
| [[Cu <sub>2</sub> (H <sub>2</sub> O) <sub>2</sub> (pcp) <sub>2</sub> bpye] <sub>n</sub> |           |            |          |        |
| O(5)-H(5A)...O(4)#1                                                                     | 0.96(4)   | 1.76(5)    | 2.682(3) | 162(4) |
| O(5)-H(5B)...O(4)#2                                                                     | 0.72(4)   | 1.97(4)    | 2.696(3) | 174(5) |
| [[Co <sub>2</sub> (H <sub>2</sub> O) <sub>2</sub> (pcp) <sub>2</sub> bpye] <sub>n</sub> |           |            |          |        |
| O(5)-H(5A)...O(4)#1                                                                     | 0.907(17) | 1.792(19)  | 2.662(3) | 160(3) |
| O(5)-H(5B)...O(4)#2                                                                     | 0.845(16) | 1.850 (18) | 2.686(3) | 170(3) |

**Table 3S.** Hydrogen bonds for STRIP and Co-pcp-bpye. Symmetry transformations used to generate equivalent atoms: #1 -x+1, -y, -z; #2 x+1, y, z.

### Rietveld quantitative phase analysis

The Bish and Howard formula (eq.1)

$$W_m = \frac{a_m S_m}{\sum_{k=1}^{k=m} a_k S_k}$$

has been used for the calculation of the relative weight fraction of the MONT2 and STRIP phases for the powdered samples collected at different days.

$W_m$  and  $a_k$  are the weight fraction of the  $m$ th component in the sample and its calculated density, respectively;  $a_k$  is given as follows:  $a_k = Z_k M_k U_k$  where  $Z_k$ ,  $M_k$ , and  $U_k$  are the number of chemical formula units in a unit cell, the molecular weight, and the unit-cell volume, respectively.

The structural data for the MONT2 and STRIP phases were taken from single crystal data. The unit cell parameters of MONT2 phase were also refined as the original crystallographic data were collected at 100 K and the XRPD patterns at room temperature.

| Sample                              | 1 (1d)                          | 2 (2d)                           | 3 (4d)                          | 4 (8d)                               | 5 (22d)                          |
|-------------------------------------|---------------------------------|----------------------------------|---------------------------------|--------------------------------------|----------------------------------|
| pattern range, $2\theta/\text{deg}$ | 4-60                            | 4-60                             | 4-60                            | 4-60                                 | 4-60                             |
| Step; Time/step                     |                                 |                                  |                                 |                                      |                                  |
| $R_p$                               | 0.042                           | 0.041                            | 0.028                           | 0.047                                | 0.035                            |
| $R_{wp}$                            | 0.057                           | 0.053                            | 0.039                           | 0.062                                | 0.046                            |
| $R_{F2}$                            | 0.094                           | 0.091                            | 0.21                            | 0.107                                | 0.156                            |
| $GOF$                               | 1.59                            | 1.36                             | 0.8                             | 1.24                                 | 1.21                             |
| Wt fraction of the two phases (%)   | MONT: 93.16(3)<br>STRIP: 6.8(2) | MONT :83.02(6)<br>STRIP: 16.9(2) | MONT: 69.1(2)<br>STRIP: 30.8(5) | MONT :<br>55.3(2)<br>STRIP : 44.6(3) | MONT : 25.7(2)<br>STRIP: 74.2(1) |

**Table 4S.** Details of the Rietveld refinement and quantitative phase analysis for samples 1÷5

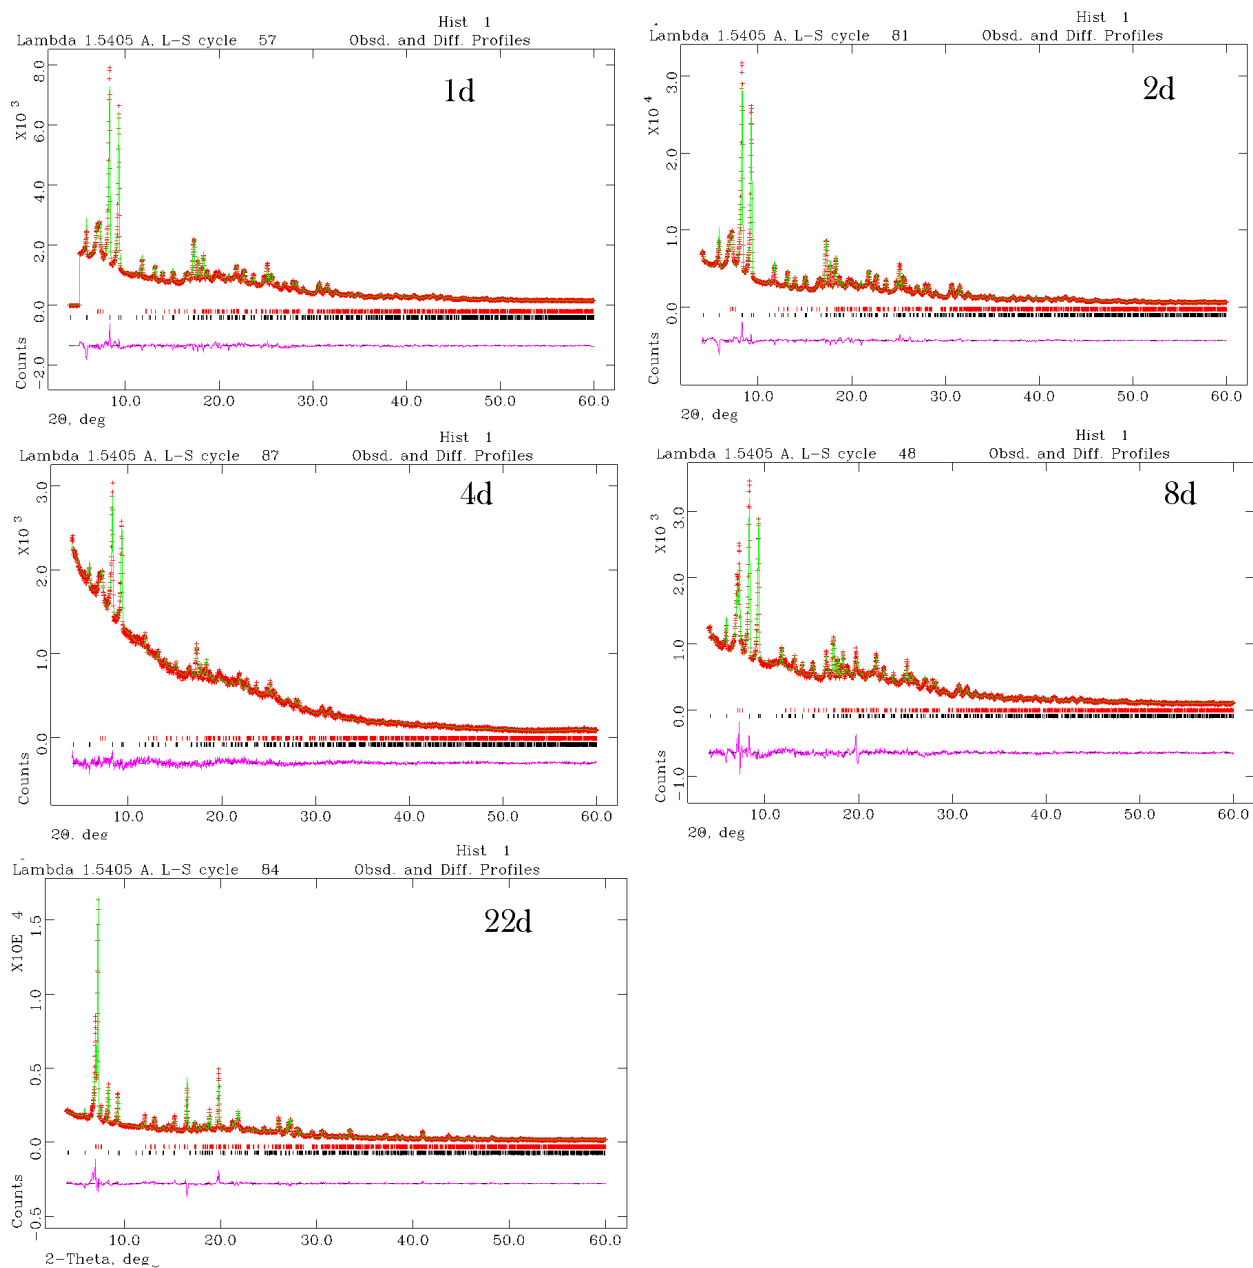

**Figure 3S.** Rietveld plots for MONT2 collected at different days.

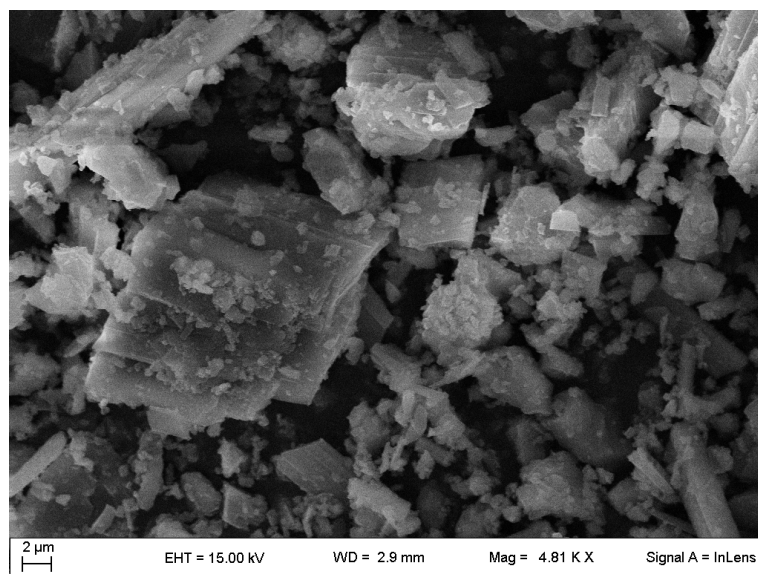

**Figure 4S.** SEM image of the pure STRIP phase.

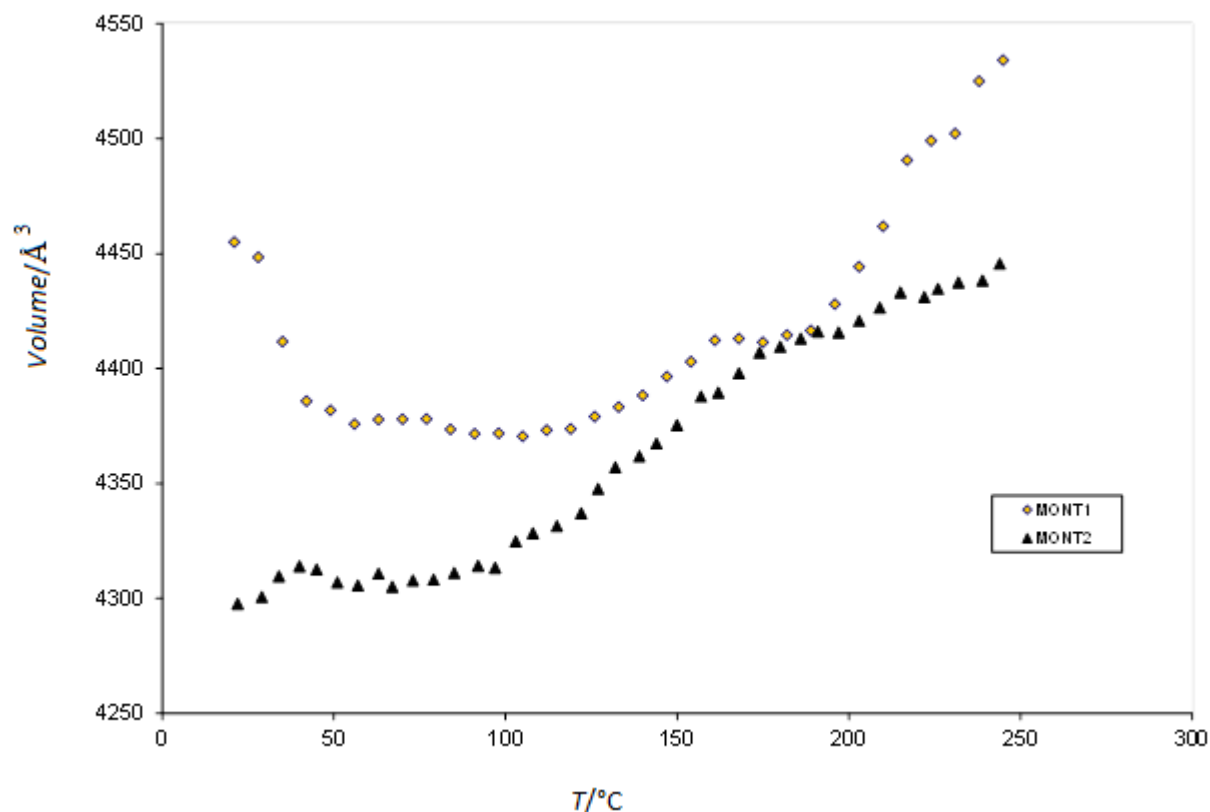

**Figure 5S.** Change of the cell volume divided by the number of tube in the unit cell for **MONT1** and **MONT2** as function of the temperature using qualitative temperature-dependent X-ray diffraction (TDXD). The TDXD was performed under flowing air with a powder diffractometer equipped with a curved position-sensitive detector (INEL CPS 120) and a high temperature attachment from Rigaku. The detector was used in a semifocusing arrangement by reflection ( $\text{Cu K}_{\alpha 1}$  radiation). With this geometry, the stationary sample is deposited on a flat sample holder located at the center of the goniometer. The counting time was 45 min for each diffraction pattern. Decompositions were carried out in flowing air with a heating rate of  $10\text{ }^{\circ}\text{C h}^{-1}$  between 17 and  $600\text{ }^{\circ}\text{C}$ . (Temperature calibration was carried out with standard materials in the involved



temperature range). The cell parameters of the heated samples were determined by performing a LeBail refinement, using the program FULLPROF, of selected thermal diffraction patterns. This analysis also revealed a reversible dilatation of the tubular frameworks (Figure 5S). In fact the cell volume of **1** increases slowly up to 100°. A brusque change is then observed around 110 °C, followed by a slower increase after 200°C. Additional cooling and heating experiments, carried out three times from room temperature up to 200 °C, showed a good reproducibility of this variation. The same experiment on **MONT2** shows a shrinking of the volume due to the escaping of the solvent water molecules, followed by a progressive increasing of the cell volume up to 300 °C.
